# Supplementary material for: The molecular landscape of premenopausal breast cancer
Source: Breast Cancer Res. 2015 Aug 7;17:104. doi: 10.1186/s13058-015-0618-8 (PMC4531812; doi:10.1186/s13058-015-0618-8)
Supplement: Additional file 1: — The Cancer Genome Atlas (TCGA) and Molecular Taxonomy of Breast Cancer International Consortium (METABRIC) - clinical data summary. Descriptive statistics of important clinical variables in TCGA and METABRIC data including disease stage, histologic type, estrogen receptor (ER) status, progesterone receptor (PR) status, and human epidermal growth factor receptor 2 (Her2) status. (XLSX 24 kb) [file 13058_2015_618_MOESM1_ESM.xlsx]

## Sheet: TCGA
Clinical Variable	Age <=45		Age >=55		Total	Chi sq test PValue
	#	%	#	%
Sample size	149		493		642
ajcc_neoplasm_disease_stage						0.09
I, IA, IB	20	13.4228	95	19.2698	115
II, IIA, IIB	81	54.3624	275	55.7809	356
III, IIIA, IIIB, IIIC	42	28.1879	103	20.8925	145
IV	1	0.671141	9	1.82556	10
TiS	1	0.671141	0	0	1
X	4	2.68456	11	2.23124	15
breast_cancer_optical_measurement_histologic_type						0.019
Infiltrating Ductal	128	85.906	379	76.8763	507
Infiltrating Lobular	6	4.02685	72	14.6045	78
Medullary	1	0.671141	2	0.40568	3
Mixed Histology	6	4.02685	13	2.63692	19
Mucinous	1	0.671141	8	1.62272	9
Other	7	4.69799	19	3.85396	26
ER status						0.141
Positive	110	73.8255	392	79.5132	502
Negative	39	26.1745	101	20.4868	140
PR status						0.321
Positive	96	64.4295	337	68.357	433
Negative	53	35.5705	152	30.8316	205
Indeterminate	0	0	4	0.811359	4
lab_proc_her2_neu_immunohistochemistry_receptor_status						0.416
Positive	27	18.1208	84	17.0385	111
Negative	74	49.6644	267	54.1582	341
Indeterminate	0	0	7	1.41988	7
Equivocal	25	16.7785	83	16.8357	108
Not performed	21	14.094	48	9.73631	69
NA	2	1.34228	4	0.811359	6
lab_procedure_her2_neu_in_situ_hybrid_outcome_type						0.746
Positive	13	8.72483	40	8.11359	53
Negative	45	30.2013	163	33.0629	208
Indeterminate	0	0	2	0.40568	2
Equivocal	1	0.671141	2	0.40568	3
Not performed	72	48.3221	244	49.4929	316
NA	18	12.0805	42	8.51927	60

## Sheet: METABRIC
Clinical variable	Age <=45 (not post)		Age >=55 (not pre)		Chi sq pvalue	ERpos, Age <=45		ERpos, Age >=55
	#	%	#	%		#	%	#	%
age_at_diagnosis
Min.	21.93		55.01			26.36		55.04
1st	36.58		61.53			38.39		62.35
Median	40.25		67.85			41.14		68.49
Mean	39.28		68.35			40.23		68.85
3rd	43.09		74.31			43.53		74.76
Max.	45		96.29			45		92.14
ER_IHC_status
neg	128	0.520325	193	0.146992	<0.001	18	0.140625	25	0.0228938
pos	118	0.479675	1120	0.853008		110	0.859375	1067	0.977106
NA	6		29			2		23
Total	252		1342			130		1115
ER.Expr
+	130	0.517928	1113	0.830597	<0.0001	130	1	1113	1
-	121	0.482072	227	0.169403		0	0	0	0
NA	1		2			0		2
Total	252		1342			130		1115
PR.Expr
+	110	0.438247	727	0.542537	0.002	101	0.776923	721	0.647799
-	141	0.561753	613	0.457463		29	0.223077	392	0.352201
NA	1		2			0		2
Total	252		1342			130		1115
HER2_IHC_status
0	1	0.0075188	0	0	0.04	1	0.0135135	0	0
1	102	0.766917	429	0.841176		63	0.851351	354	0.885
2	3	0.0225564	14	0.027451		2	0.027027	10	0.025
3	27	0.203008	67	0.131373		8	0.108108	36	0.09
NA	119		831			56		715
Total	252		1341			130		1115
HER2_SNP6_state
GAIN	68	0.272	267	0.199701		24	0.186047	195	0.175676
LOSS	13	0.052	67	0.0501122		10	0.0775194	57	0.0513514
NEUT	169	0.676	1003	0.750187		95	0.736434	858	0.772973
NA	2		5			1		5
Total	252		1342			130		1115
Her2.Expr
+	49	0.195219	134	0.1	<0.0001	12	0.0923077	78	0.0700809
-	202	0.804781	1206	0.9		118	0.907692	1035	0.929919
NA	1		2			0		2
Total	252		1342			130		1115
NOT_IN_OSLOVAL_menopausal_status_inferred
post	0	0	1340	1		0	0	1113	1
pre	251	1	0	0		130	1	0	0
NA	1		2			0		2
Total	252		1342			130		1115
Treatment
CT	22	0.0876494	12	0.00895522		5	0.0384615	2	0.00179695
CT/HT	6	0.0239044	13	0.00970149		4	0.0307692	10	0.00898473
CT/HT/RT	35	0.139442	65	0.0485075		21	0.161538	46	0.0413297
CT/RT	71	0.282869	50	0.0373134		8	0.0615385	5	0.00449236
HT	11	0.0438247	356	0.265672		11	0.0846154	327	0.293801
HT/RT	23	0.0916335	509	0.379851		23	0.176923	471	0.423181
NONE	43	0.171315	198	0.147761		26	0.2	161	0.144654
RT	40	0.159363	137	0.102239		32	0.246154	91	0.081761
NA	1	0.00398406	2	0.00149254		0	0	2	0.00179695
Total	252		1342			130		1115
size
Min.	1		1			1		1
1st	16		18			15		18
Median	22		23			20		23
Mean	26.57		26.48			24.16		26.14
3rd	30		30			27		30
Max.	182		180			99		180
NA	4		14			1		12
lymph_nodes_positive
Min.	0		0			0		0
1st	0		0			0		0
Median	1		0			0		0
Mean	2.131		1.856			1.262		1.796
3rd	3		2			1		2
Max.	41		45			15		45
NA	1		5			0		4
grade
1	13	0.0526316	118	0.0924765	<0.0001	13	0.100775	114	0.10775
2	70	0.283401	553	0.433386		60	0.465116	515	0.486767
3	164	0.663968	605	0.474138		56	0.434109	429	0.405482
NA	5		66			1		57
Total	252		1342			130		1115
histological_type
DCIS	1	0.00396825	6	0.00447094		0	0	3	0.00269058
IDC	210	0.833333	1048	0.780924		97	0.746154	865	0.775785
IDC+ILC	9	0.0357143	57	0.0424739		9	0.0692308	51	0.0457399
IDC-MED	5	0.0198413	17	0.0126677		1	0.00769231	4	0.00358744
IDC-MUC	4	0.015873	34	0.0253353		4	0.0307692	32	0.0286996
IDC-TUB	8	0.031746	35	0.0260805		8	0.0615385	35	0.0313901
ILC	10	0.0396825	113	0.0842027		9	0.0692308	100	0.0896861
INVASIVE TUMOR	2	0.00793651	5	0.00372578		1	0.00769231	3	0.00269058
NST AND A SPECIAL TYPE	0	0	3	0.00223547		0	0	3	0.00269058
OTHER	1	0.00396825	10	0.00745156		1	0.00769231	8	0.00717489
OTHER INVASIVE	0	0	11	0.00819672		0	0	9	0.00807175
PHYL	1	0.00396825	1	0.000745156		0	0	0	0
NA	1	0.00396825	2	0.00149031		0	0	2	0.00179372
Total	252		1342			130		1115
NOT_IN_OSLOVAL_stage
Min.	0		0			0		0
1st	0		0			1		0
Median	1		1			1		1
Mean	1.264		1.18			1.2		1.141
3rd	2		2			2		2
Max.	3		4			3		4
NA	51		317			20		269
NOT_IN_OSLOVAL_cellularity
high	124	0.518828	660	0.506523		61	0.491935	548	0.504604
low	34	0.142259	135	0.103607		17	0.137097	103	0.0948435
moderate	81	0.338912	508	0.38987		46	0.370968	435	0.400552
NA	13		39			6		29
Total	252		1342			130		1115
NOT_IN_OSLOVAL_P53_mutation_status
MUT	17	0.153153	55	0.104563	0.142	5	0.0735294	35	0.077951
WT	94	0.846847	471	0.895437		63	0.926471	414	0.922049
NA	141		816			62		666
Total	252		1342			130		1115
NOT_IN_OSLOVAL_P53_mutation_type
FRAMESHIFT	0	0	2	0.0363636		0	0	2	0.0571429
MISSENSE	12	0.705882	36	0.654545		4	0.8	24	0.685714
MISSENSE:TRUNCATING	1	0.0588235	0	0		0	0	0	0
TRUNCATING	4	0.235294	17	0.309091		1	0.2	9	0.257143
NA	235		1287			125		1080
Total	252		1342			130		1115
NOT_IN_OSLOVAL_Pam50Subtype
Basal	92	0.366534	156	0.116418	<0.0001	6	0.0461538	24	0.0215633
Her2	36	0.143426	148	0.110448		10	0.0769231	77	0.0691824
LumA	58	0.231076	513	0.382836		58	0.446154	509	0.457323
LumB	29	0.115538	401	0.299254		29	0.223077	401	0.360288
NC	0	0	6	0.00447761		0	0	6	0.00539084
Normal	36	0.143426	116	0.0865672		27	0.207692	96	0.0862534
NA	1		2			0		2
Total	252		1342			130		1115
