# Supplementary material for: The molecular landscape of premenopausal breast cancer
Source: Breast Cancer Res. 2015 Aug 7;17:104. doi: 10.1186/s13058-015-0618-8 (PMC4531812; doi:10.1186/s13058-015-0618-8)
Supplement: Additional file 5: — Ingenuity pathway analysis (IPA) in The Cancer Genome Atlas (TCGA) union of RNA seq and Agilent data. Top canonical pathways detected by IPA using the union of differentially expressed genes in Agilent and RNA-Seq expression platforms in TCGA. Four columns correspond to Ingenuity canonical pathway names, −log(p value), percentage of genes detected in this pathway, and molecules in this pathway. (XLS 15 kb) [file 13058_2015_618_MOESM5_ESM.xls]

## Sheet: Canonical Pathways in TCGA
Ingenuity Canonical Pathways	-log(p-value)	Ratio	Molecules
Integrin Signaling	9.08	0.205	FYN,ARHGAP26,ARPC5,HRAS,TLN1,MYLK,ITGA10,PTEN,NCK2,SHC1,TSPAN3,PPP1R12A,MRAS,AKT3,ITGB4,ACTG2,RHOF,ACTN1,VASP,ITGAD,ITGB1,CAPN5,SRC,NRAS,ITGA2,ACTN3,ITGA6,RAC1,PIK3C2G,TSPAN2,ITGA5,RHOJ,PDGFB,MYL9,CAPNS1,PAK3,ACTA2,CAPN1,ITGA1,PAK7
Regulation of Cellular Mechanics by Calpain Protease	8.51	0.345	ITGB1,CAPN5,SRC,NRAS,ACTN3,ITGA2,HRAS,EGF,ITGA5,TLN1,CDK1,CCNA2,CCNE1,CAPNS1,EZR,CAPN1,MRAS,ACTN1,EGFR
Epithelial Adherens Junction Signaling	7.77	0.217	TCF4,SNAI2,TGFBR3,PVRL3,ARPC5,EGF,HRAS,PTEN,TUBA8,MRAS,AKT3,PVRL1,ACTG2,ACTN1,EGFR,SRC,TUBB3,NRAS,MYH14,ACTN3,RAC1,WASF1,FGF1,MYL9,CDH2,CDH1,TUBA1A,ACTA2,SSX2IP,PARD3,ACVR2A
Axonal Guidance Signaling	7.74	0.148	DPYSL2,GLI2,NTF4,ARPC5,HRAS,NTN1,NCK2,PLCD3,EPHB1,WNT7B,MRAS,PLCB1,FIGF,GNA13,EFNB3,ADAMTS5,PRKD1,TUBB3,CFL1,EPHA1,BMP8A,GNG2,RAC1,ITGA5,VEGFC,PDGFB,MYL9,PLCB3,PAK7,GNAL,NRP1,FYN,ENPEP,PDGFA,EGF,PRKCZ,SEMA4C,WNT2,EFNB2,SHC1,TUBA8,NGFR,ADAM19,AKT3,PRKCE,PFN2,VASP,PPP3CA,BMP1,PRKCA,ITGB1,NRAS,ITGA2,PIK3C2G,SLIT2,EPHA3,PLCB4,TUBA1A,PAK3,NTRK3,MMP9,FZD7,SEMA7A
FAK Signaling	7.72	0.267	ITGB1,CAPN5,SRC,FYN,NRAS,ARHGAP26,ITGA2,PIK3C2G,RAC1,HRAS,EGF,ITGA5,TLN1,PTEN,CAPNS1,PAK3,ACTA2,CAPN1,MRAS,AKT3,PAK7,ACTG2,EGFR
Hepatic Fibrosis / Hepatic Stellate Cell Activation	7.44	0.189	CTGF,COL4A6,PDGFA,KLF6,EGF,TNFSF10,COL17A1,COL6A6,COL15A1,COL6A1,TGFB1,NGFR,LAMA1,PDGFRA,FIGF,COL22A1,COL18A1,KLF12,SERPINE1,TIMP2,EGFR,TNFSF11,COL6A2,MYH14,VEGFC,IFNAR2,PDGFB,FGF1,MYL9,COL6A3,ACTA2,IGFBP3,CCL21,TGFA,EDNRA,A2M,MMP9
Virus Entry via Endocytic Pathways	7.42	0.258	ITGB1,SRC,FYN,AP2A1,AP2M1,NRAS,ITGA2,PIK3C2G,ITGA6,RAC1,HRAS,ITGA5,PRKCZ,DNM1,ACTA2,FLNA,MRAS,PRKCE,ITGA1,ITGB4,ACTG2,PRKD1,PRKCA
Actin Cytoskeleton Signaling	7.11	0.181	F2R,PDGFA,DIAPH3,ARPC5,EGF,HRAS,TLN1,MYLK,FGF13,SHC1,IQGAP2,PPP1R12A,FLNA,EZR,MRAS,PFN2,GNA13,ACTG2,ACTN1,ITGB1,NRAS,CFL1,MYH14,ITGA2,ACTN3,RAC1,PIK3C2G,ITGA5,WASF1,GSN,PDGFB,FGF1,MYL9,PAK3,ACTA2,ARHGAP35,PAK7,MSN
Ephrin Receptor Signaling	6.88	0.192	FYN,PDGFA,ARPC5,EGF,HRAS,NCK2,SHC1,EFNB2,EPHB1,MRAS,AKT3,FIGF,EFNB3,GNA13,ITGB1,SRC,NRAS,CFL1,EPHA1,ITGA2,GNG2,RAC1,PIK3C2G,VEGFC,ITGA5,EPHA3,CREB5,PDGFB,FGF1,PAK3,PAK7,MAP4K4,GNAL
Thrombin Signaling	6.01	0.176	F2RL2,CAMK1,F2R,EGF,HRAS,MYLK,PRKCZ,PLCD3,SHC1,PPP1R12A,MRAS,PLCB1,AKT3,PRKCE,GNA13,RHOF,PRKD1,EGFR,PRKCA,RPS6KB1,SRC,NRAS,ITPR2,GNG2,ADCY3,PIK3C2G,RHOJ,ITPR1,MYL9,PLCB4,PLCB3,ARHGEF10,GNAL
Paxillin Signaling	5.9	0.222	ITGAD,ITGB1,SRC,NRAS,ACTN3,ITGA2,PIK3C2G,RAC1,ITGA6,HRAS,ITGA5,TLN1,ITGA10,NCK2,PAK3,ACTA2,MRAS,ITGA1,PAK7,ACTG2,ITGB4,ACTN1
Role of Tissue Factor in Cancer	5.87	0.215	ITGB1,SRC,FYN,RPS6KB1,CTGF,NRAS,CFL1,EGR1,RPS6KA3,PIK3C2G,RAC1,ITGA6,VEGFC,HRAS,F3,PTEN,MRAS,PLCB1,AKT3,GNA13,CYR61,EGFR,PRKCA
Caveolar-mediated Endocytosis Signaling	5.72	0.25	ITGAD,ITGB1,FYN,SRC,ITGA2,ITGA6,EGF,ITGA5,ITGA10,ACTA2,FLNA,PTPN1,ITGA1,INSR,ACTG2,ITGB4,EGFR,PRKCA
Leukocyte Extravasation Signaling	5.69	0.171	CLDN11,MMP3,MMP16,MMP14,JAM2,PRKCZ,MMP24,EZR,PRKCE,ACTG2,DLC1,PRKD1,VASP,ACTN1,TIMP2,PRKCA,MMP19,ITGB1,SRC,MMP28,ACTN3,ITGA2,ITGA6,PIK3C2G,RAC1,ITGA5,THY1,CLDN23,ACTA2,ARHGAP35,ITGA1,MMP9,MSN
PAK Signaling	5.58	0.227	ITGB1,ARHGAP10,NRAS,CFL1,PDGFA,ITGA2,PIK3C2G,RAC1,HRAS,ITGA5,MYLK,EPHA3,PDGFB,NCK2,MYL9,SHC1,PAK3,PDGFRA,MRAS,PAK7
Agrin Interactions at Neuromuscular Junction	5.53	0.254	ITGB1,SRC,NRAS,LAMA2,ITGA2,RAC1,ITGA6,HRAS,ITGA5,LAMC1,ACTA2,PAK3,MRAS,ITGA1,PAK7,ACTG2,EGFR
Glioblastoma Multiforme Signaling	5.49	0.186	PDGFA,EGF,HRAS,WNT2,PTEN,PLCD3,SHC1,WNT7B,PDGFRA,MRAS,AKT3,PLCB1,RHOF,EGFR,RPS6KB1,SRC,NRAS,ITPR2,RAC1,PIK3C2G,RHOJ,ITPR1,PDGFB,CCNE1,PLCB4,PLCB3,FZD7
RhoGDI Signaling	5.41	0.174	ARPC5,PPP1R12A,EZR,MRAS,GNA13,ACTG2,RHOF,CDH13,DLC1,PRKCA,ITGB1,SRC,CFL1,ITGA2,GNG2,RAC1,ITGA5,WASF1,RHOJ,MYL9,CDH1,CDH2,ACTA2,PAK3,ARHGAP35,PAK7,ARHGEF10,ESR1,GNAL,MSN
Germ Cell-Sertoli Cell Junction Signaling	5.34	0.179	PVRL3,HRAS,TUBA8,TGFB1,PPAP2B,MRAS,ACTG2,RHOF,ACTN1,ITGB1,SRC,TUBB3,NRAS,CFL1,ITGA2,ACTN3,RAC1,ITGA6,PIK3C2G,RHOJ,GSN,CDH1,CDH2,TUBA1A,PAK3,ACTA2,PAK7,A2M
Gap Junction Signaling	5.14	0.179	HRAS,EGF,PRKCZ,PLCD3,TUBA8,MRAS,PRKCE,AKT3,PLCB1,ACTG2,PPP3CA,GUCY1B3,PRKD1,EGFR,PRKCA,SRC,TUBB3,NRAS,ITPR2,ADCY3,PIK3C2G,ITPR1,PLCB4,TUBA1A,ACTA2,PLCB3,NPR2
Neuregulin Signaling	5.14	0.221	ITGB1,SRC,RPS6KB1,NRAS,ITGA2,HRAS,EGF,ITGA5,PRKCZ,PTEN,SHC1,MRAS,TGFA,AKT3,PRKCE,ERRFI1,PRKD1,EGFR,PRKCA
Bladder Cancer Signaling	5.14	0.221	NRAS,MMP3,MMP28,TFDP1,MMP16,MMP14,HRAS,EGF,VEGFC,MMP24,FGF13,FGF1,CDH1,THBS1,MRAS,FIGF,MMP9,MMP19,EGFR
Sertoli Cell-Sertoli Cell Junction Signaling	4.86	0.167	CLDN11,TGFBR3,PVRL3,JAM2,HRAS,PTEN,TUBA8,PPAP2B,CGN,MRAS,AKT3,PVRL1,ACTG2,ACTN1,GUCY1B3,ITGB1,SRC,TUBB3,NRAS,ITGA2,ACTN3,RAC1,ITGA5,YBX3,CDH1,TUBA1A,CLDN23,ACTA2,A2M
Macropinocytosis Signaling	4.79	0.235	ITGB1,SRC,NRAS,PDGFA,RAC1,PIK3C2G,HRAS,EGF,ITGA5,PDGFB,PRKCZ,MRAS,PRKCE,ITGB4,PRKD1,PRKCA
CXCR4 Signaling	4.68	0.172	HRAS,PRKCZ,MRAS,PRKCE,AKT3,PLCB1,GNA13,RHOF,PRKD1,PRKCA,SRC,NRAS,ITPR2,EGR1,GNG2,ADCY3,RAC1,PIK3C2G,RHOJ,ITPR1,MYL9,PLCB4,PAK3,PLCB3,PAK7,GNAL
Cholecystokinin/Gastrin-mediated Signaling	4.63	0.198	SRC,NRAS,ITPR2,MEF2A,SRF,HRAS,RHOJ,ITPR1,PRKCZ,SHC1,PLCB4,MRAS,PLCB3,PLCB1,PRKCE,GNA13,RHOF,PRKD1,EGFR,PRKCA
FcÎ³ Receptor-mediated Phagocytosis in Macrophages and Monocytes	4.63	0.204	SRC,FYN,RPS6KB1,ARPC5,PIK3C2G,RAC1,TLN1,PLD1,PRKCZ,PTEN,NCK2,ACTA2,EZR,AKT3,PRKCE,ACTG2,VASP,PRKD1,PRKCA
p70S6K Signaling	4.6	0.186	SRC,RPS6KB1,F2RL2,NRAS,JAK1,F2R,PIK3C2G,HRAS,PLD1,PRKCZ,PLCD3,SHC1,PLCB4,IRS1,MRAS,PLCB1,AKT3,PRKCE,PLCB3,PRKD1,PRKCA,EGFR
Actin Nucleation by ARP-WASP Complex	4.58	0.25	NCK2,ITGB1,NRAS,PPP1R12A,ITGA2,ARPC5,MRAS,RAC1,HRAS,ITGA5,RHOJ,WASF1,RHOF,VASP
EGF Signaling	4.58	0.25	RPS6KB1,SRC,JAK1,ITPR2,SRF,PIK3C2G,HRAS,EGF,ITPR1,SHC1,CSNK2A2,AKT3,EGFR,PRKCA
Regulation of Actin-based Motility by Rho	4.49	0.207	ITGB1,CFL1,ARPC5,ITGA2,RAC1,ITGA5,WASF1,RHOJ,MYLK,GSN,MYL9,PAK3,ACTA2,PPP1R12A,PFN2,PAK7,ACTG2,RHOF
CCR3 Signaling in Eosinophils	4.39	0.186	NRAS,CFL1,ITPR2,GNG2,PIK3C2G,RAC1,HRAS,MYLK,ITPR1,PRKCZ,PLCB4,PAK3,PPP1R12A,MRAS,PLCB3,PLCB1,PRKCE,PAK7,PRKD1,PRKCA,PLA2G12A
Inhibition of Matrix Metalloproteases	4.35	0.289	MMP28,MMP3,MMP16,MMP14,RECK,A2M,TFPI2,MMP9,MMP24,TIMP2,MMP19
Signaling by Rho Family GTPases	4.33	0.146	DIAPH3,ARPC5,MYLK,PRKCZ,STMN1,PPP1R12A,EZR,CIT,MRAS,GNA13,ACTG2,RHOF,CDH13,ITGB1,CFL1,SEPT4,ITGA2,GNG2,PIK3C2G,RAC1,ITGA5,WASF1,RHOJ,PLD1,MYL9,CDH1,CDH2,PAK3,ACTA2,PAK7,PARD3,ARHGEF10,GNAL,MSN
Molecular Mechanisms of Cancer	4.16	0.128	FYN,TCF4,JAK1,HRAS,PRKCZ,WNT2,SHC1,NLK,CCND3,TGFB1,WNT7B,MRAS,PRKCE,AKT3,PLCB1,GNA13,RHOF,PRKD1,BMP1,PRKCA,ITGB1,SRC,NRAS,TFDP1,CDK7,BMP8A,ITGA2,ADCY3,RAC1,PIK3C2G,ITGA5,RHOJ,AURKA,BAK1,DAXX,CDH1,PLCB4,CCNE1,CCND2,PAK3,IRS1,PLCB3,PAK7,ARHGEF10,GNAL,FZD7
GNRH Signaling	4.09	0.173	SRC,NRAS,ITPR2,EGR1,ADCY3,RAC1,HRAS,EGF,ITPR1,CREB5,PRKCZ,DNM1,PLCB4,PAK3,MRAS,PLCB3,PLCB1,PRKCE,PAK7,PRKD1,EGFR,PRKCA
Phospholipase C Signaling	4.04	0.143	FYN,RPS6KA3,HRAS,PRKCZ,SHC1,PPP1R12A,MRAS,PRKCE,PLCB1,GNA13,RHOF,PRKD1,PPP3CA,PLA2G12A,PRKCA,ITGB1,SRC,NRAS,ITPR2,ADCY3,ITGA2,GNG2,RAC1,MEF2A,ITGA5,RHOJ,ITPR1,CREB5,PLD1,MYL9,PLCB4,PLCB3,ARHGEF10
IL-8 Signaling	4.03	0.153	EGF,HRAS,PRKCZ,CCND3,MRAS,FIGF,PRKCE,AKT3,GNA13,RHOF,VASP,PRKD1,EGFR,PRKCA,RPS6KB1,SRC,NRAS,GNG2,RAC1,PIK3C2G,VEGFC,RHOJ,PLD1,MYL9,CDH1,CCND2,MAP4K4,MMP9
Glioma Signaling	4.03	0.191	CAMK1,NRAS,TFDP1,PDGFA,PIK3C2G,HRAS,EGF,PDGFB,PRKCZ,PTEN,SHC1,PDGFRA,MRAS,AKT3,PRKCE,PRKD1,EGFR,PRKCA
Rac Signaling	3.99	0.184	ITGB1,RPS6KB1,NRAS,CFL1,ARPC5,ITGA2,PIK3C2G,RAC1,HRAS,ITGA5,WASF1,PRKCZ,PLD1,MCF2L,IQGAP2,PAK3,MRAS,PAK7,PARD3
Endothelin-1 Signaling	3.87	0.155	HRAS,CASP4,PRKCZ,PLCD3,SHC1,MRAS,PRKCE,PLCB1,GNA13,PRKD1,GUCY1B3,PRKCA,PLA2G12A,PLA2G16,SRC,NRAS,ITPR2,ADCY3,PIK3C2G,ITPR1,PLD1,PLCB4,CASP2,EDNRA,PLCB3,GNAL
Non-Small Cell Lung Cancer Signaling	3.82	0.215	FHIT,NRAS,TFDP1,ITPR2,PIK3C2G,HRAS,EGF,ITPR1,RARB,TGFA,MRAS,AKT3,EGFR,PRKCA
NF-ÎºB Activation by Viruses	3.81	0.205	ITGB1,NRAS,ITGA2,ITGA6,PIK3C2G,HRAS,ITGA5,PRKCZ,MRAS,PRKCE,AKT3,ITGA1,EIF2AK2,PRKD1,PRKCA
ILK Signaling	3.72	0.149	SNAI2,PTEN,NCK2,PPP1R12A,FLNA,PPAP2B,FIGF,AKT3,IRS2,ITGB4,ACTG2,RHOF,ACTN1,ITGB1,CFL1,MYH14,ACTN3,PIK3C2G,VEGFC,RHOJ,CREB5,MYL9,CDH1,ACTA2,IRS1,RSU1,MMP9
PTEN Signaling	3.64	0.169	ITGB1,RPS6KB1,NRAS,TGFBR3,ITGA2,RAC1,HRAS,ITGA5,MAGIX,PRKCZ,PTEN,SHC1,CSNK2A2,NTRK3,NGFR,PDGFRA,MRAS,AKT3,INSR,EGFR
HER-2 Signaling in Breast Cancer	3.6	0.197	ITGB1,NRAS,PIK3C2G,HRAS,EGF,PRKCZ,CCNE1,MRAS,PRKCE,AKT3,ITGB4,PARD3,PRKD1,EGFR,PRKCA
ErbB Signaling	3.56	0.188	RPS6KB1,NRAS,PIK3C2G,HRAS,EGF,PRKCZ,NCK2,SHC1,PAK3,TGFA,MRAS,PRKCE,PAK7,PRKD1,EGFR,PRKCA
RhoA Signaling	3.54	0.167	CFL1,SEPT4,ANLN,EPHA1,ARPC5,WASF1,MYLK,PLD1,MYL9,RAPGEF2,PPP1R12A,ACTA2,EZR,CIT,PFN2,ARHGAP35,GNA13,ACTG2,DLC1,MSN
ERK5 Signaling	3.4	0.206	SRC,RPS6KB1,NRAS,SGK1,MRAS,RPS6KA3,MEF2A,HRAS,EGF,GNA13,CREB5,PRKCZ,EGFR
Breast Cancer Regulation by Stathmin1	3.38	0.142	CAMK1,HRAS,PRKCZ,SHC1,STMN1,TUBA8,PPP1R12A,MRAS,PRKCE,PLCB1,GNA13,PRKD1,PRKCA,TUBB3,NRAS,ITPR2,ADCY3,GNG2,RAC1,PIK3C2G,ITPR1,CDK1,PLCB4,CCNE1,TUBA1A,PLCB3,ARHGEF10
Colorectal Cancer Metastasis Signaling	3.34	0.134	TCF4,JAK1,MMP3,ADRBK1,MMP16,MMP14,EGF,HRAS,MMP24,WNT2,TGFB1,WNT7B,MRAS,FIGF,AKT3,RHOF,EGFR,MMP19,SRC,NRAS,MMP28,ADCY3,GNG2,RAC1,PIK3C2G,VEGFC,RHOJ,CDH1,TLR5,MMP9,FZD7
UVC-Induced MAPK Signaling	3.25	0.238	SRC,NRAS,MRAS,PRKCE,HRAS,SMPD2,PRKCZ,PRKD1,PRKCA,EGFR
Clathrin-mediated Endocytosis Signaling	3.24	0.141	AP2A1,F2R,PDGFA,ARPC5,EGF,FGF13,AMPH,FIGF,ACTG2,ITGB4,SH3KBP1,PPP3CA,MYO6,ITGB1,SRC,AP2M1,RAC1,PIK3C2G,ITGA5,VEGFC,PDGFB,FGF1,DNM1,CSNK2A2,ACTA2,CLU
Granulocyte Adhesion and Diapedesis	3.21	0.145	ITGB1,CLDN11,MMP3,MMP28,MMP16,MMP14,ITGA2,ITGA6,CKLF,THY1,ITGA5,MMP24,CLDN23,CXCL13,NGFR,EZR,CCL21,ITGA1,CXCL17,CX3CL1,MMP9,MSN,HSPB1,MMP19
Agranulocyte Adhesion and Diapedesis	3.21	0.143	CLDN11,MMP3,MMP16,MMP14,MMP24,CXCL13,EZR,ACTG2,CXCL17,MMP19,ITGB1,MMP28,MYH14,ITGA2,CKLF,ITGA6,ITGA5,MYL9,CLDN23,ACTA2,CCL21,ITGA1,CX3CL1,MMP9,MSN
Tec Kinase Signaling	3.19	0.147	ITGB1,SRC,FYN,JAK1,GNG2,ITGA2,PIK3C2G,TNFSF10,ITGA5,RHOJ,PRKCZ,STAT4,PAK3,ACTA2,MRAS,PRKCE,PAK7,ACTG2,GNA13,RHOF,GNAL,PRKD1,PRKCA
Tight Junction Signaling	3.18	0.145	CLDN11,F2RL2,MYH14,CRB3,PVRL3,JAM2,RAC1,YBX3,MYLK,CASK,PRKCZ,PTEN,MYL9,CLDN23,ACTA2,TGFB1,NGFR,CGN,CEBPA,AKT3,PVRL1,ACTG2,NAPA,VASP
HIF1Î± Signaling	3.15	0.168	EGLN2,NRAS,MMP28,SLC2A1,MMP3,MMP16,MMP14,PIK3C2G,HRAS,VEGFC,LDHB,MMP24,MRAS,AKT3,FIGF,MMP9,MMP19
VEGF Family Ligand-Receptor Interactions	3.09	0.184	NRAS,PIK3C2G,HRAS,VEGFC,PRKCZ,SHC1,MRAS,PRKCE,AKT3,FIGF,PRKD1,PLA2G12A,NRP1,PRKCA
Semaphorin Signaling in Neurons	3.05	0.212	ITGB1,DPYSL2,FYN,CFL1,PAK3,RAC1,RHOJ,PAK7,RHOF,SEMA7A,NRP1
PDGF Signaling	3.03	0.182	CSNK2A2,SHC1,SRC,NRAS,JAK1,PDGFA,PDGFRA,MRAS,PIK3C2G,SRF,HRAS,EIF2AK2,PDGFB,PRKCA
Renal Cell Carcinoma Signaling	3	0.188	ETS1,NRAS,PAK3,SLC2A1,TGFB1,MRAS,TGFA,PIK3C2G,RAC1,AKT3,HRAS,PAK7,PDGFB
